# Supplementary material for: Binder-free SnO2–TiO2 composite anode with high durability for lithium-ion batteries
Source: Royal Society of Chemistry journal article supplement (doi:10.1039/c8ra10358e), 2019-01-01
Supplement: c8ra10358e1.pdf [file c8ra10358e1.pdf]

## Supplementary Information

### **Binder-free SnO<sub>2</sub>-TiO<sub>2</sub> composite anode with high durability for lithium-ion batteries**

Hyeonseok Yoo,<sup>a</sup> Gibaek Lee,<sup>\*b</sup> and Jinsub Choi<sup>\*a</sup>

<sup>a</sup>Department of Chemistry and Chemical Engineering, Inha University,  
22212 Incheon, Republic of Korea

<sup>b</sup>Chemical Engineering for Energy, School of Chemical Engineering Yeungnam University,  
38541 Gyeongsan, Republic of Korea

\* To whom correspondence should be addressed.

Tel: +82-53-810-2527 (G. Lee) or 82-32-860-7471 (J. Choi),

e-mail: gibaek@ynu.ac.kr (G. Lee) or jinsub@inha.ac.kr (J. Choi)

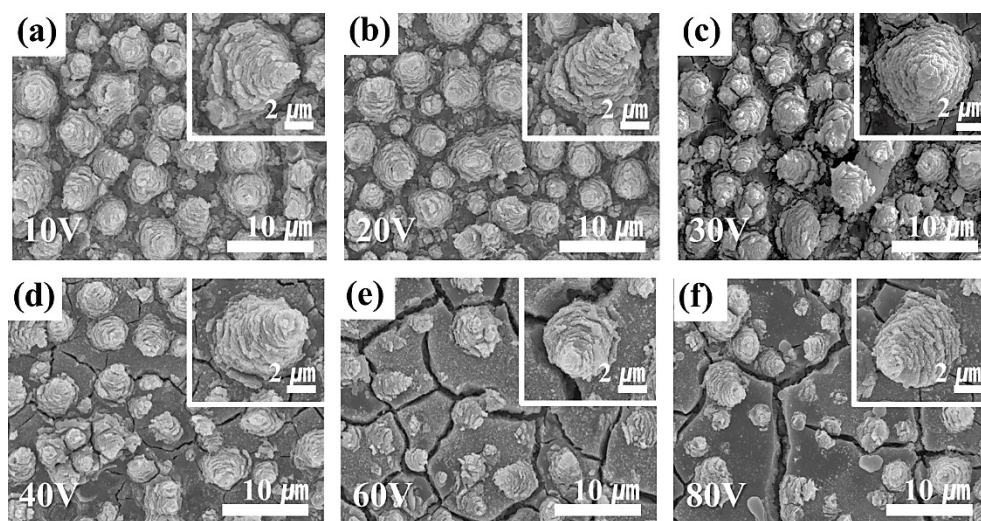

**Figure S1.** The representative FE-SEM images of MCs and SnO<sub>2</sub>/TiO<sub>2</sub> MCs. The applied shock potentials are expressed at the bottom of large images identically. The high-magnification images indicates the conical structure can be withstand even in high anodic shock potential.

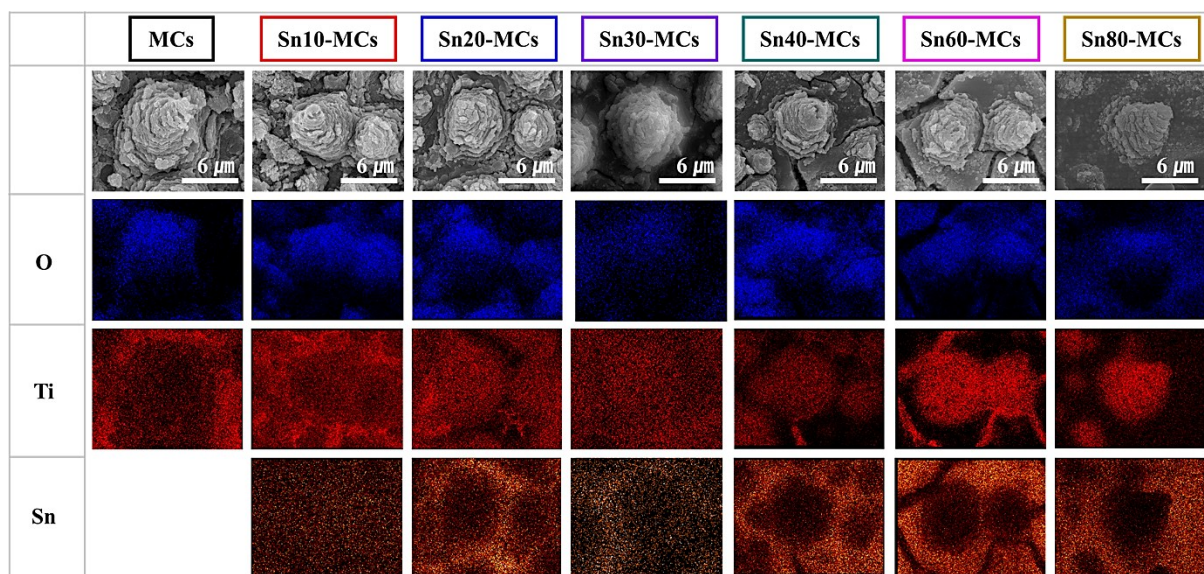

**Figure S2.** EDS element maps of O, Ti and Sn for all prepared specimens. From 20 V of anodic shock potential, the Sn distribution morphology is apparently formed.

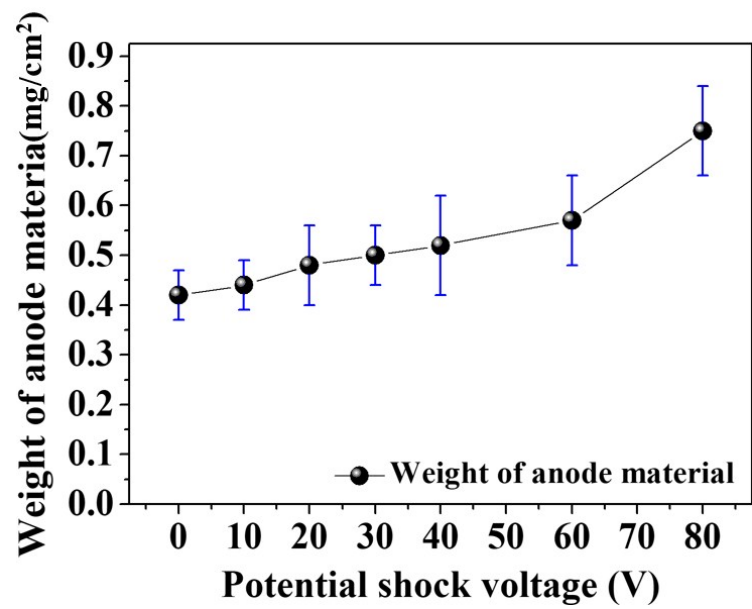

**Figure S3.** The average mass of binder-free electrodes which are shown as a function of shock potential.

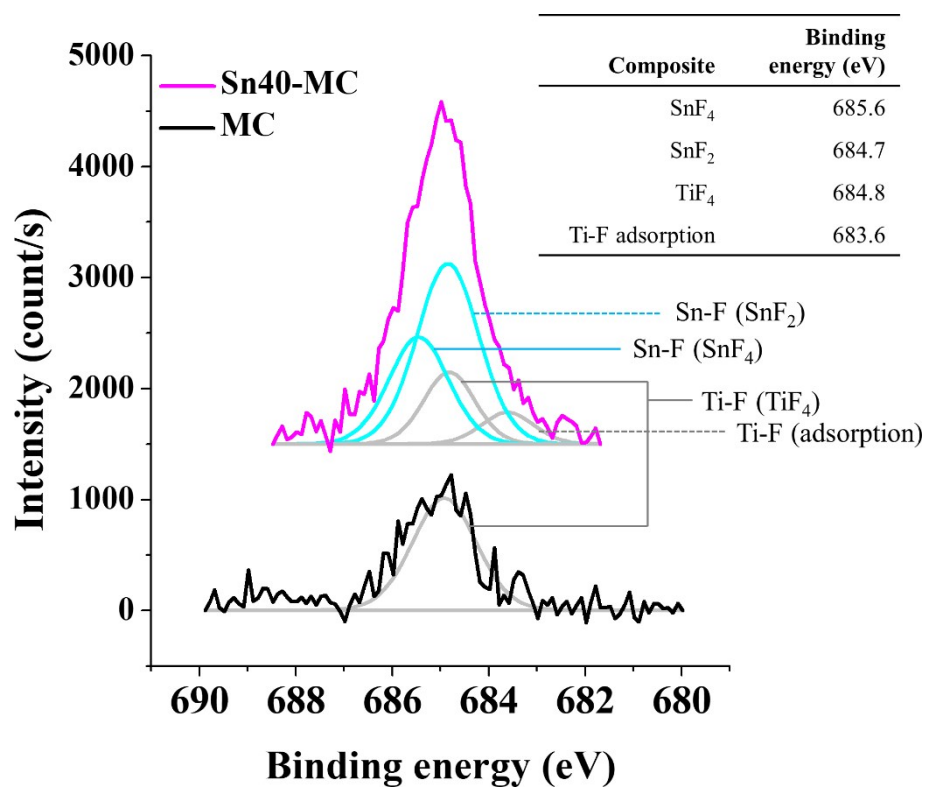

**Figure S4.** XPS spectra illustrating the change of F1s binding states after potential shock at 40 V for 10 sec.<sup>1-4</sup> All measurements are performed before cell assembly.

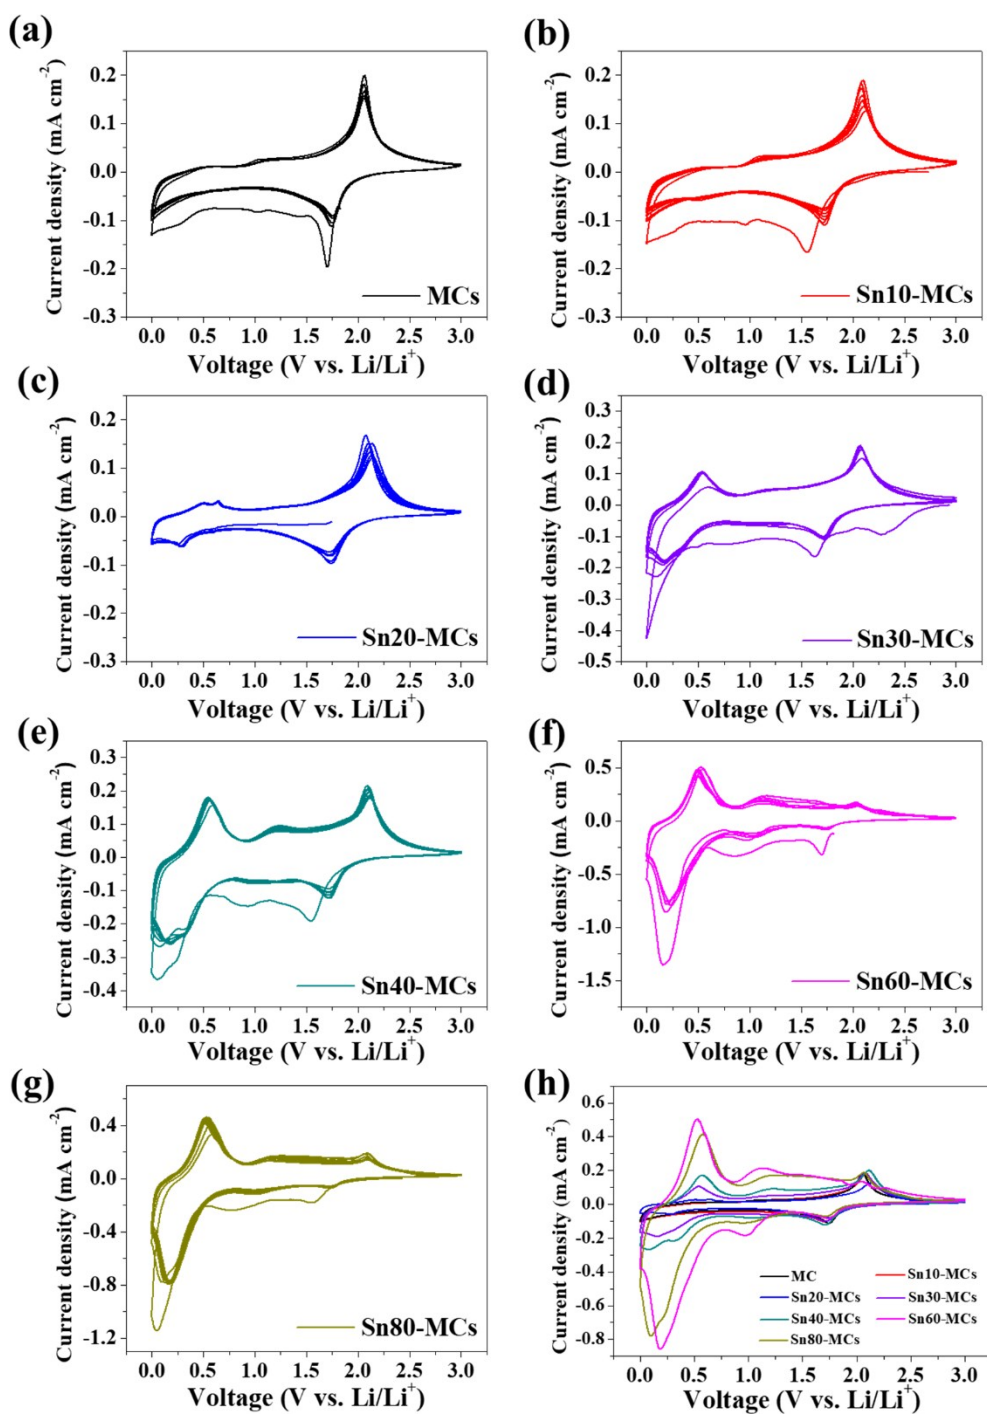

**Figure S5.** All CV result cycled at  $0.1 \text{ mV sec}^{-1}$  (vs  $\text{Li/Li}^+$ ) for 5 times on the  $\text{SnO}_2\text{-TiO}_2$  MCs prepared at each anodic shock potential; 0 V (a), 10 V (b), 20 V (c), 30 V (d), 40 V (e), 60 V (f) and 80 V (g). (h) is the identical CV image enclosed in manuscript.

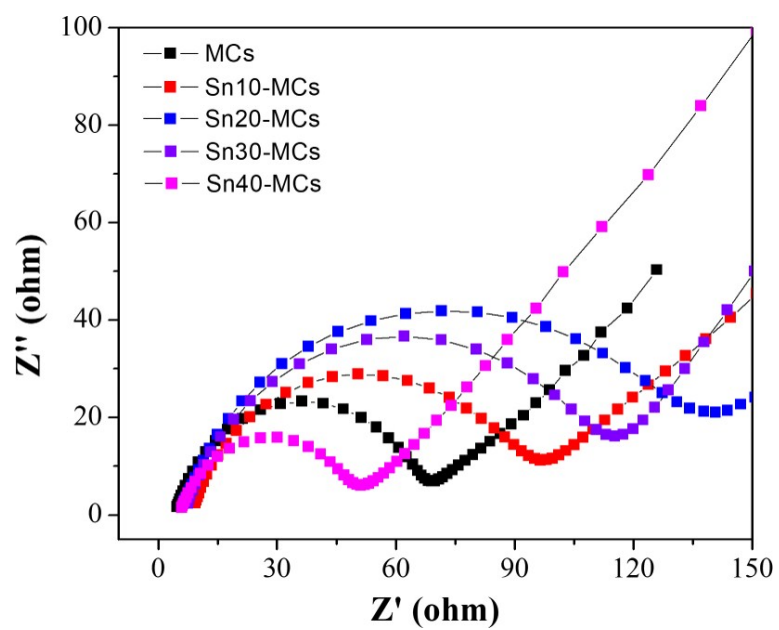

**Figure S6.** EIS Nyquist plots that are measured on SnO<sub>2</sub>-TiO<sub>2</sub> MCs prepared at divers shock voltage.

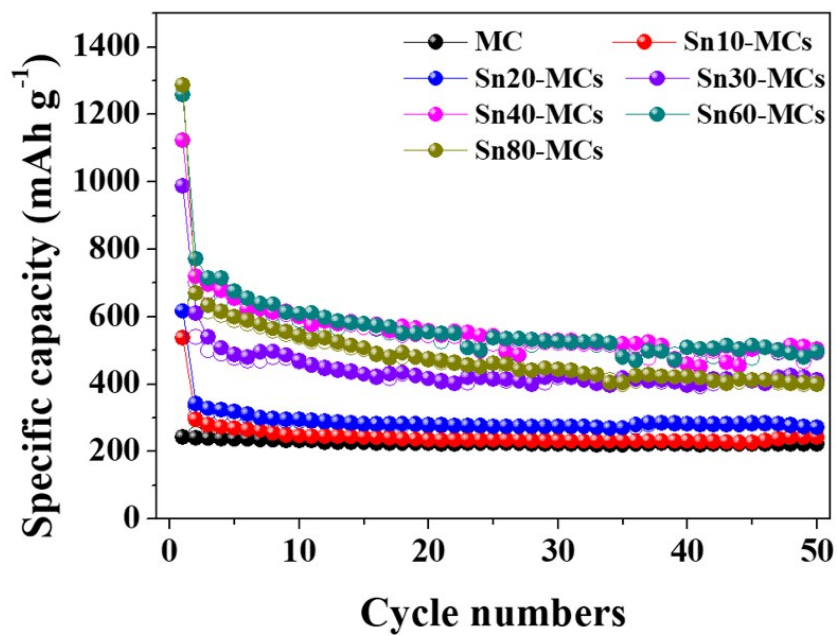

**Figure S7.** Cyclability plot vs cycle numbers of the tested samples (various shock voltages) at 0.5 C.



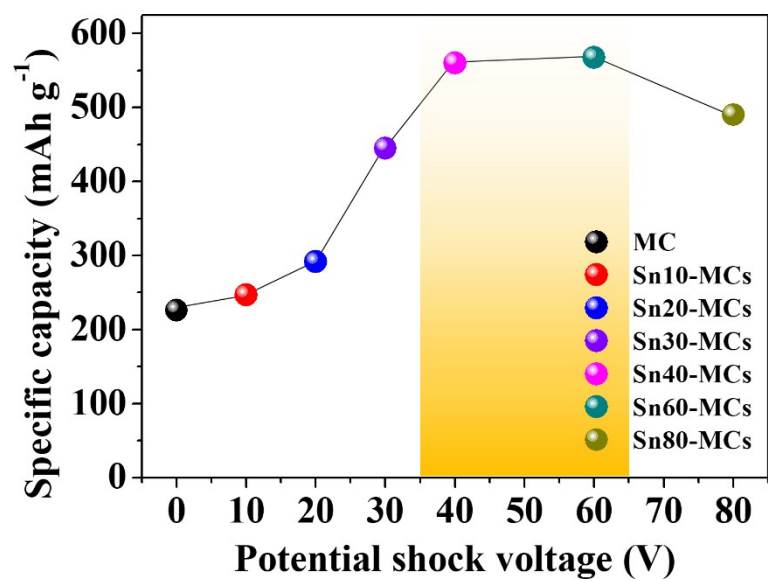

**Figure S8.** The average specific capacity of each sample in Fig. 6b showing convexity around Sn40-MCs and Sn60-MCs.

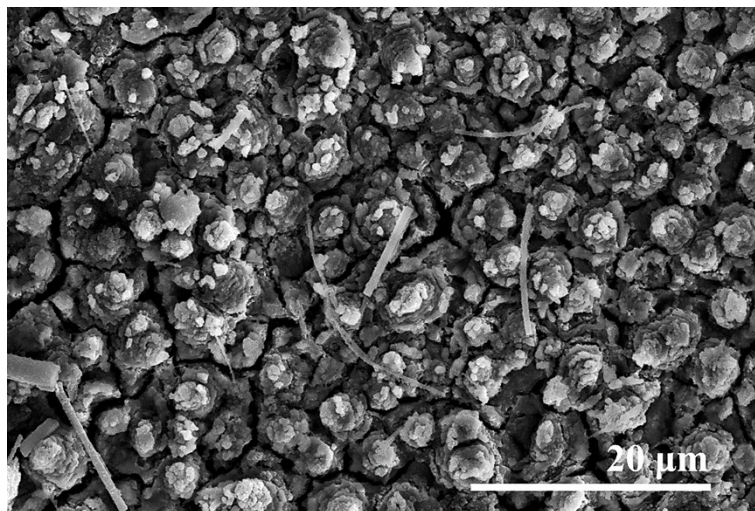

**Figure S9.** SEM images of the Sn40-MC electrode at first full-charging.

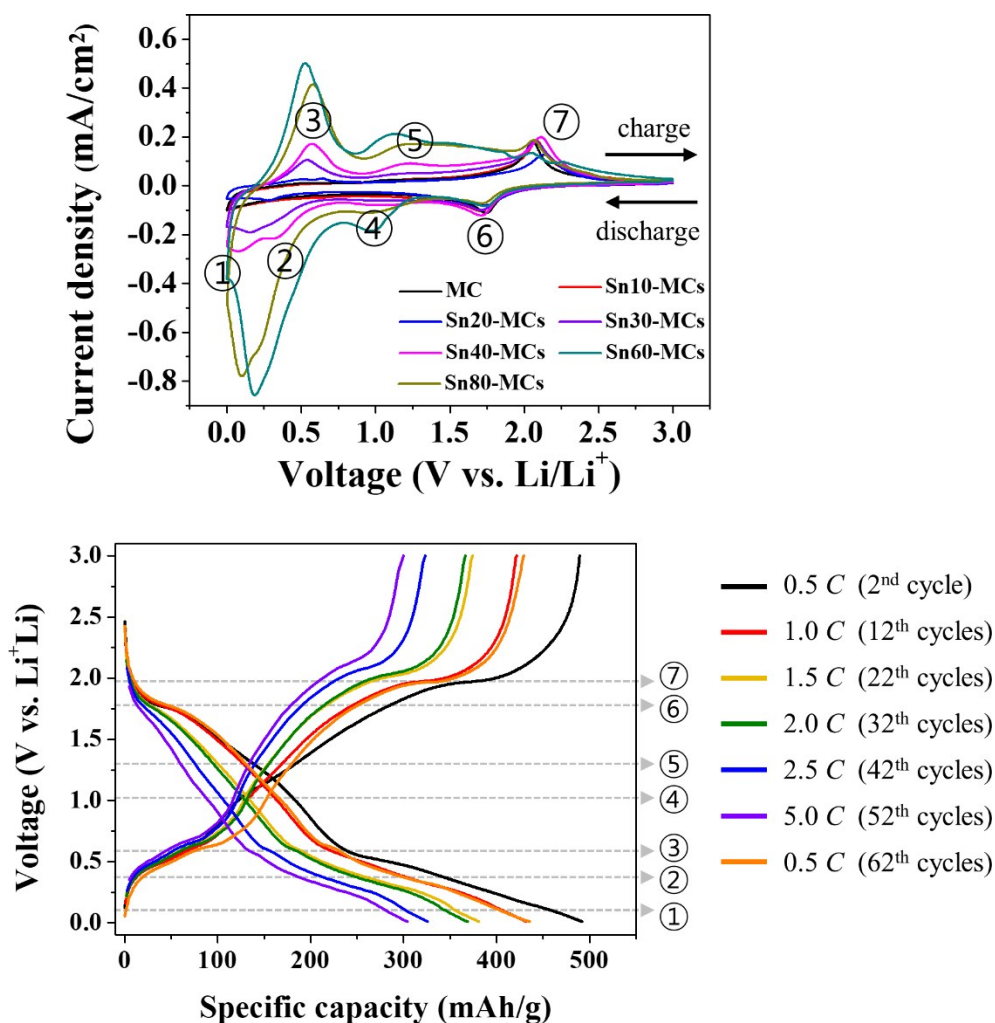

**Figure S10.** The galvanostatic charge/discharge profile of Fig. 6d. Individual profiles are extracted from 2<sup>nd</sup> cycle at each scan rate. The plateaus in profile are compared to cyclic voltammogram in Fig. 6a to match with each peak in Fig. 6a.

## References

1. Z. T. Ildefonso, P. B. J. de Jesús, T. L. C. Ynueth, L. R. Luis, M. L. M. Lusia, and M. V. Yunny, *RSC Adv.* 2016, **6**, 76167.
2. X. Y. Ma, Z. G. Chen, S. B. Hartono, H. B. Jiang, J. Zou, S. Z. Qiao, and H. G. Yang, *Chem. Comm.* 2010, **46**, 6608.
3. H. Liu, J. Ma, J. Gong, and J. Xu, *J. Non-Cryst. Solids* 2015, **419**, 92.
4. S. Hong, M.-H. Choo, Y. H. Kwon, J. Y. Kim, and S.-W. Song, *J. Electrochem. Soc.* 2014, **161**, A1851.
